# Supplementary material
Source: Springer Nature journal article supplement (https://www.springermedizin.de/resource/supplementary/12987_2009_306_MOESM7_ESM.pdf/9611756)

## Parietal Cortex

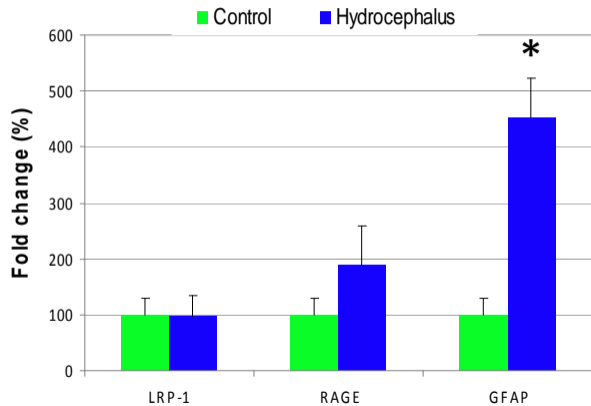

## Hippocampus

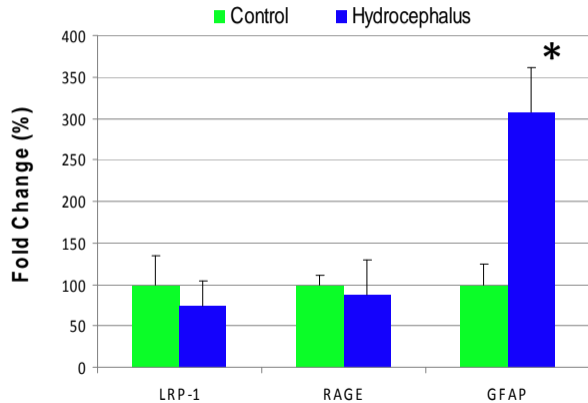

Supplement: MOESM7 [file 9611756]
